# Supplementary material for: Response of Soil Microbial Communities and Functions to Long-Term Tea (Camellia sinensis L.) Planting in a Subtropical Region
Source: MDPI journal article supplement (doi:10.3390/f14071288), 2023-06-22
Supplement: s1 [file s1]

## Supplementary Information

**Table S1.** Relative abundance of the most abundant bacterial phyla (>1%) present in the different planting ages tea plantations<sup>1</sup>

| Phylum                  | Y0 <sup>2</sup>      | Y6       | Y12     | Y23      | Y35      |
|-------------------------|----------------------|----------|---------|----------|----------|
| <i>Acidobacteria</i>    | 28.34 a <sup>3</sup> | 9.41 c   | 9.41 c  | 21.08 b  | 25.12 ab |
| <i>Proteobacteria</i>   | 20.96 c              | 39.71 ab | 41.40 a | 37.54 ab | 34.02 b  |
| <i>Chloroflexi</i>      | 13.27 a              | 9.50 a   | 3.35 b  | 8.64 a   | 10.08 a  |
| <i>Firmicutes</i>       | 12.44 a              | 12.49 a  | 16.03 a | 8.27 b   | 6.39 b   |
| <i>Bacteroidetes</i>    | 9.45 bc              | 10.99 ab | 13.80 a | 7.44 cd  | 6.05 d   |
| <i>GAL15</i>            | 4.30 a               | 0.08 b   | 0.01 b  | 0.20 b   | 0.16 b   |
| <i>Verrucomicrobia</i>  | 2.79 a               | 1.41 b   | 1.60b   | 2.37 ab  | 2.14 ab  |
| <i>Actinobacteria</i>   | 2.37 c               | 11.52 a  | 8.01 b  | 6.65 b   | 7.31 b   |
| <i>Rokubacteria</i>     | 1.48 a               | 0.02 b   | 0.02 b  | 0.05 b   | 0.23 b   |
| <i>Planctomycetes</i>   | 1.41 a               | 0.61 b   | 0.36 b  | 1.42 a   | 1.62 a   |
| <i>Gemmatimonadetes</i> | 1.19 ab              | 0.23 b   | 0.09 b  | 1.70 a   | 2.20 a   |
| <i>WPS-2</i>            | 0.61 b               | 2.02 a   | 2.90 a  | 1.99 a   | 2.14 a   |

<sup>1</sup>Data are mean values  $\pm$  standard deviation ( $n = 4$ ); <sup>2</sup> Y0 represent wood land; Y6, Y12, Y23 and Y35 represent tea planting for 6, 12, 23 and 35 years; <sup>3</sup> Lowercase letters indicate significant differences between restoration ages at  $p < 0.05$ .

**Table S2.** Relative abundance of the most abundant fungal phyla (>1%) present in the different planting ages tea plantations<sup>1</sup>

| Phylum                   | Y0 <sup>2</sup> | Y6      | Y12     | Y23     | Y35     |
|--------------------------|-----------------|---------|---------|---------|---------|
| <i>Ascomycota</i>        | 53.53 a         | 54.14 a | 55.27 a | 39.27 a | 38.63 a |
| <i>Basidiomycota</i>     | 39.13 a         | 33.45 a | 29.17 a | 19.45 a | 35.32 a |
| <i>Mortierellomycota</i> | 1.8 b           | 7.52 ab | 8.62 a  | 10.1 a  | 5.3 ab  |
| <i>Rozellomycota</i>     | 0.12 a          | 0.88 a  | 1.07 a  | 4.59 a  | 7.41 a  |

<sup>1</sup>Data are mean values  $\pm$  standard deviation ( $n = 4$ ); <sup>2</sup> Y0 represent wood land; Y6, Y12, Y23 and Y35 represent tea planting for 6, 12, 23 and 35 years;<sup>3</sup> Lowercase letters indicate significant differences between restoration ages at  $p < 0.05$ .

**Table S3.** Bacterial function group (Top10) present in the different planting ages tea plantations<sup>1</sup>

| Function group                | Y0 <sup>2</sup> | Y6     | Y12    | Y23     | Y35    |
|-------------------------------|-----------------|--------|--------|---------|--------|
| chemoheterotrophy             | 32.75c          | 37.04a | 34.78b | 34.36bc | 35.12b |
| fermentation                  | 24.74a          | 16.03b | 22.19a | 14.93b  | 13.75b |
| aerobic_chemoheterotrophy     | 9.95c           | 22.26a | 14.66b | 20.77a  | 22.69a |
| animal_parasites_or_symbionts | 9.82a           | 5.07bc | 6.64b  | 4.87bc  | 4.24c  |
| nitrate_reduction             | 4.57a           | 3.56ab | 4.31a  | 2.81b   | 2.59b  |
| cellulolysis                  | 1.51b           | 2.92ab | 1.61b  | 2.36ab  | 3.22a  |
| human_gut                     | 2.93a           | 1.85b  | 2.79a  | 1.98b   | 1.70b  |
| mammal_gut                    | 2.93a           | 1.85b  | 2.79a  | 1.98b   | 1.70b  |
| nitrogen_fixation             | 1.29b           | 2.66a  | 1.08b  | 3.10a   | 2.96a  |
| others                        | 9.51a           | 8.79b  | 7.66ab | 7.36ab  | 6.76ab |

<sup>1</sup>Data are mean values  $\pm$  standard deviation ( $n = 4$ ); <sup>2</sup> Y0 represent wood land; Y6, Y12, Y23 and Y35 represent tea planting for 6, 12, 23 and 35 years; <sup>3</sup> Lowercase letters indicate significant differences between restoration ages at  $p < 0.05$ .

**Table S4.** Fungal function group present in the different planting ages tea plantations<sup>1</sup>

| Function group | Y0 <sup>2</sup> | Y6      | Y12    | Y23     | Y35    |
|----------------|-----------------|---------|--------|---------|--------|
| Saprotroph     | 50.07ab         | 61.52a  | 62.05a | 58.37ab | 30.83b |
| Pathotroph     | 14.51b          | 26.17ab | 29.73a | 28.13ab | 37.03a |
| Symbiotroph    | 35.42a          | 12.31ab | 8.21b  | 13.50ab | 32.14a |

<sup>1</sup>Data are mean values  $\pm$  standard deviation ( $n = 4$ ); <sup>2</sup> Y0 represent wood land; Y6, Y12, Y23 and Y35 represent tea planting for 6, 12, 23 and 35 years;<sup>3</sup> Lowercase letters indicate significant differences between restoration ages at  $p < 0.05$ .

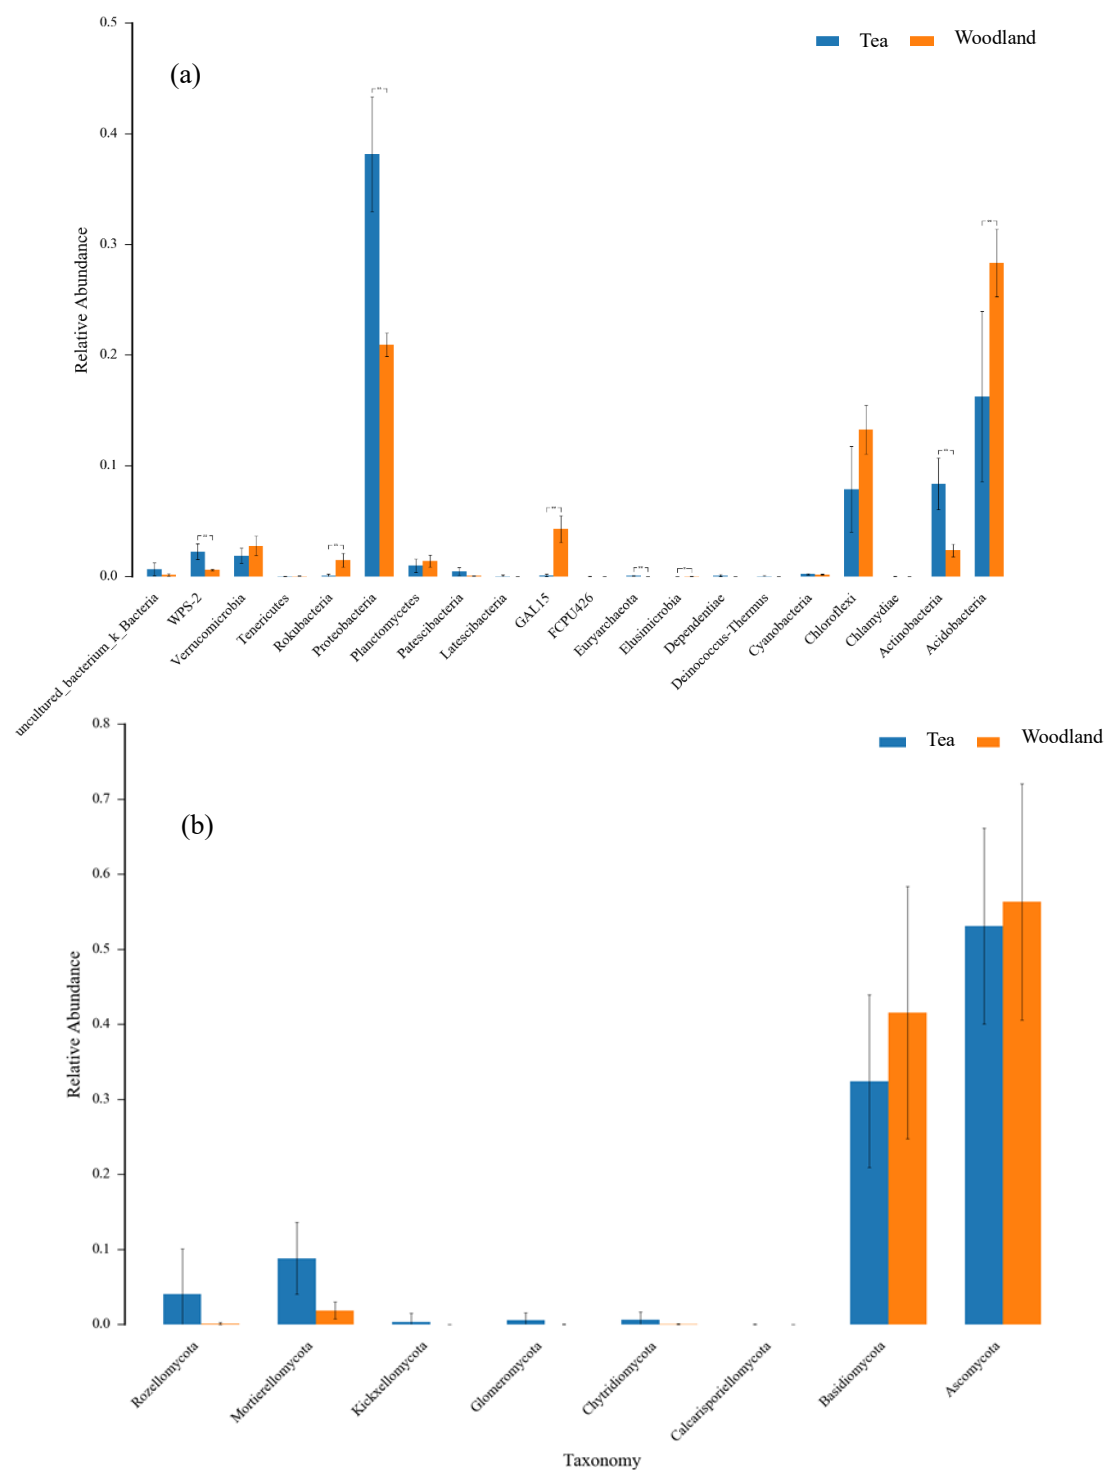

**Figure S1.** Analysis of variance analyses (ANOVA) showing the differential distribution of soil bacterial **(a)** and fungal **(b)** community between tea plantations and wood land.

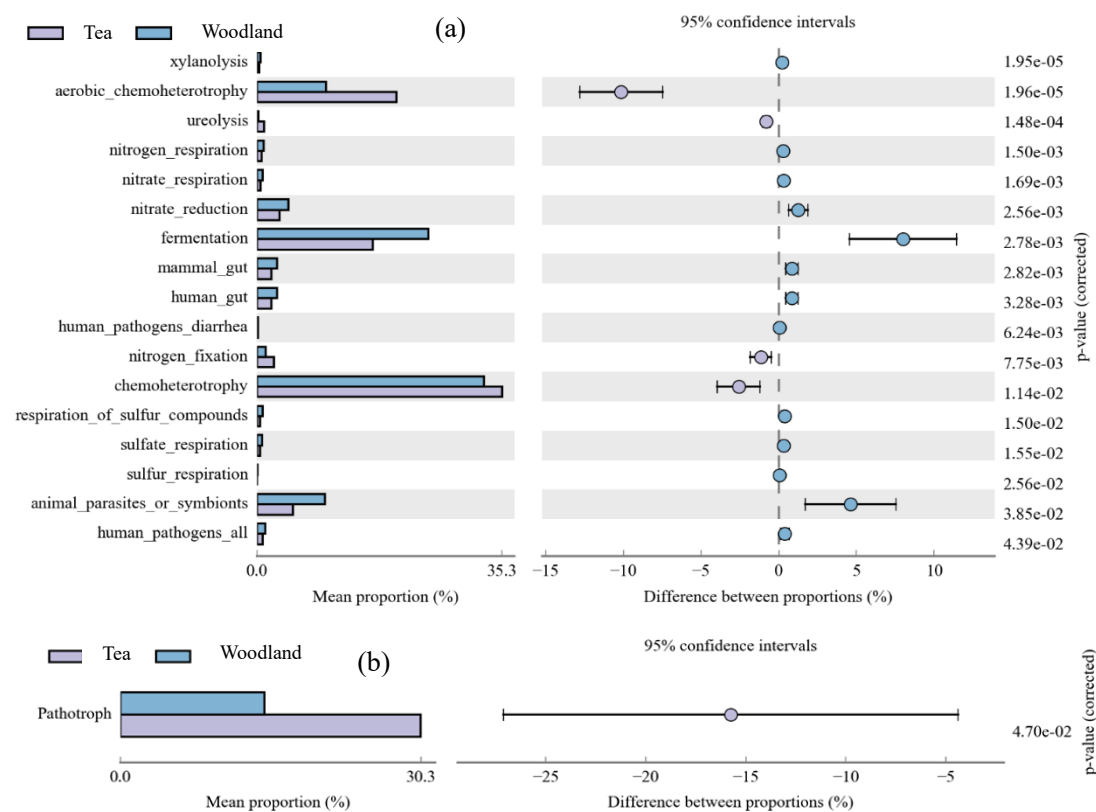

**Figure S2.** Statistically significant differences in the bacterial **(a)** and fungal **(b)** function group between tea plantations and wood land.
